# Supplementary material for: Equatorial mountains on Pluto are covered by methane frosts resulting from a unique atmospheric process
Source: PubMed Central journal article supplement (PMC7553927; doi:10.1038/s41467-020-18845-3), 2020-10-13
Supplement: 41467_2020_18845_MOESM1_ESM.pdf [file 41467_2020_18845_MOESM1_ESM.pdf]

- 1 Equatorial mountains on Pluto are covered by methane frosts
- 2 resulting from a unique atmospheric process
- 3
- 4 Bertrand et al.

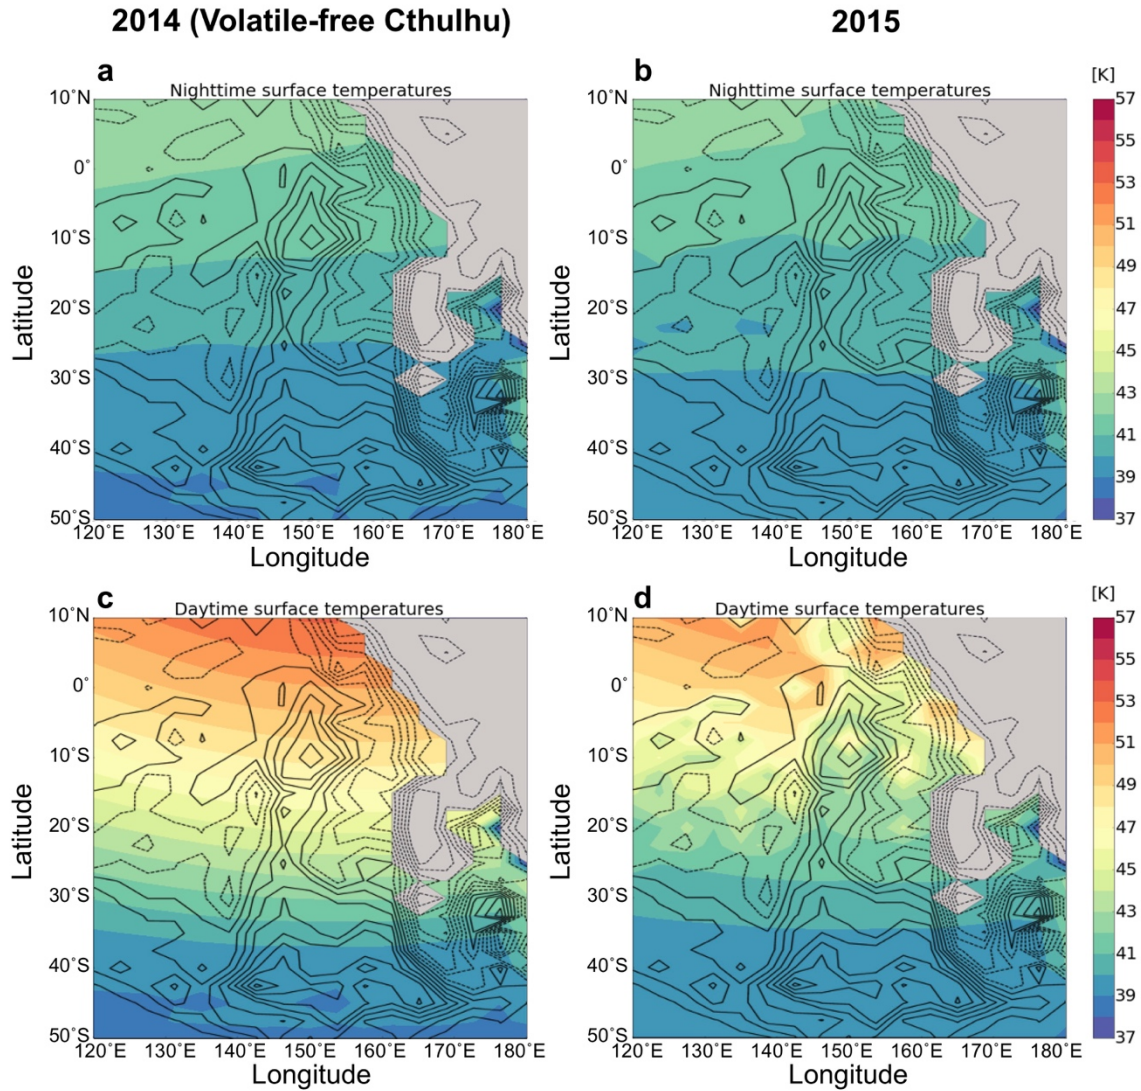

5

6 **Supplementary Fig. 1. Equatorial surface temperatures on Pluto.** Maps of nighttime (a-b) and

7 daytime (c-d) surface temperatures (K) simulated by the Pluto GCM in Cthulhu in 2014 (when the

8 region is still volatile free, a-c) and in 2015 (b-d). Daytime surface temperatures in 2015 are

9 decreased on top of Pigafetta Montes due to the formation of bright CH<sub>4</sub> deposits.

10

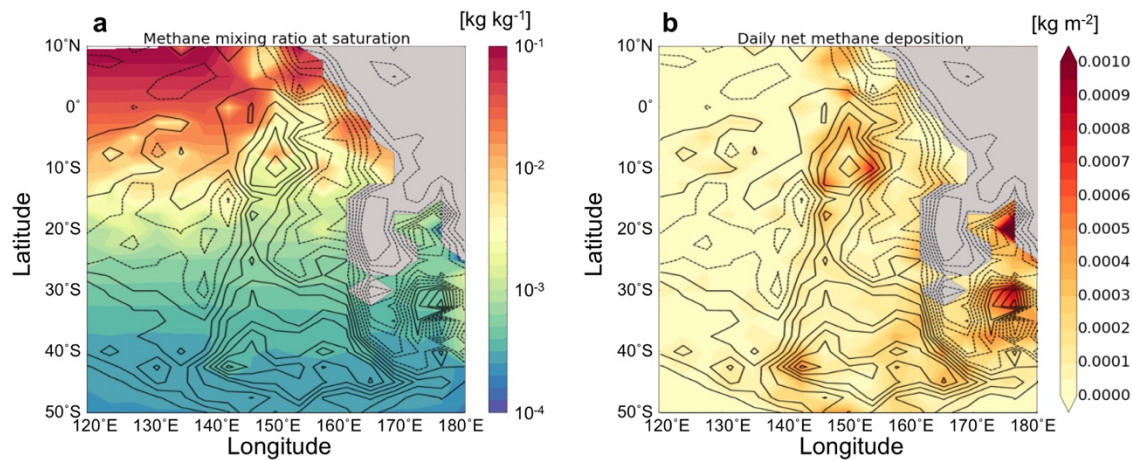

11

12 **Supplementary Fig. 2. Saturation of gaseous CH<sub>4</sub> above the surface and condensation.** (a)

13 Map the CH<sub>4</sub> mass mixing ratio at saturation calculated by the GCM in the region of Cthulhu in

14 2015. The ratio is lower on top of Pigafetta Montes due to the presence of bright CH<sub>4</sub> deposits and

15 subsequent lower surface temperatures (albedo feedback), which allows for further CH<sub>4</sub>

16 condensation there. (b) Map of the same region showing the daily net CH<sub>4</sub> deposition as obtained

17 with the GCM in 2015. CH<sub>4</sub> mostly deposits on top of the mountain chains, where the nighttime

18 condensation dominates the daytime sublimation, with a net accumulation of  $\sim 0.005 \text{ kg m}^{-2}$  (or

19  $\sim 1 \text{ }\mu\text{m}$ ) per Pluto day in July 2015.

20

21

22

23

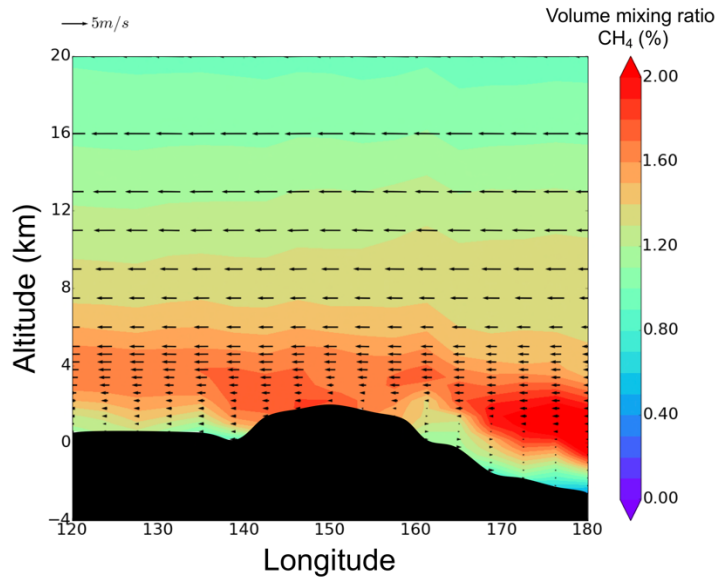

24

25 **Supplementary Fig. 3. Atmospheric abundance of CH<sub>4</sub> in the model.** Cross section at 5°S in  
 26 the region of Pigafetta Montes showing the volume mixing ratio of methane in the atmosphere as  
 27 simulated by the GCM in July 2015. An enriched layer of gaseous methane forms at ~4 km altitude.  
 28 The zonal wind is indicated by the arrows.

29

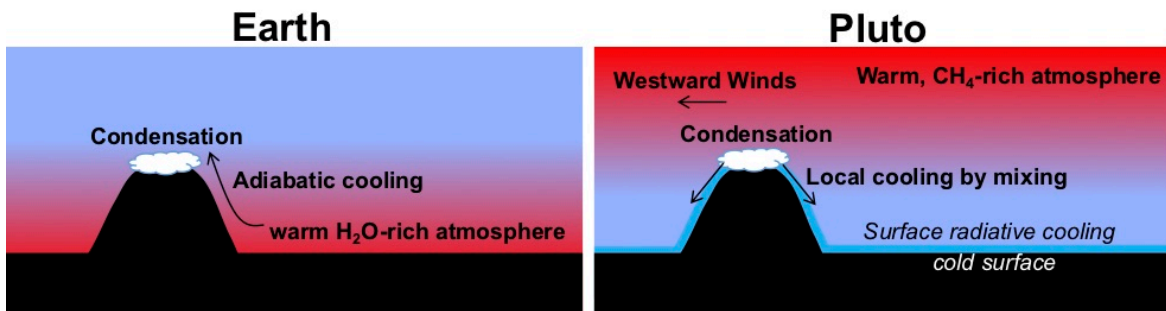

30

31 **Supplementary Fig. 4. Comparison of the mechanisms forming snow cap mountains on**  
 32 **Earth and on Pluto.**

33

34

35

36

## 37 **Supplementary Discussion**

### 38 **SD1. Equatorial CH<sub>4</sub> frost on Pluto: preference for north-facing slopes and mountain tops.**

39 Supplementary Fig. 5, 6 and 7 show equatorial and mid-latitude regions on Pluto west of Sputnik

40 Planitia where CH<sub>4</sub>-rich frosts have been detected by New Horizons' Ralph/MVIC instrument<sup>2,3</sup>.

41 Within the dark terrains of Pluto's equatorial regions, CH<sub>4</sub>-rich frost is not only seen at the summit

42 regions of Pigafetta and Elcano Montes, but also on many north-facing slopes located between

43 20°S and 10°N. This includes crater walls and rims (such as Oort, Edgeworth, Brinton and

44 Harrington craters) and the scarps of faults such as Virgil and Beatrice Fossa, as shown by the

45 white arrows in Supplementary Fig. 6.

46 Farther north in Viking and Venera Terra, CH<sub>4</sub>-rich frost is seen to coat the entire rims of impact

47 craters (forming the "bright halo craters"<sup>6</sup>), with more ice occurring on south-facing slopes than

48 north-facing slopes (yellow arrows, Supplementary Fig. 6a-b). Outside Cthulhu, CH<sub>4</sub>-rich ice tends

49 to be present in larger amounts at high altitude, as indicated by the 890 nm CH<sub>4</sub> maps of MVIC

50 showing more band depth at altitude<sup>2</sup>, even at high latitude. For instance, CH<sub>4</sub>-rich ice is seen on

51 the slopes of the mountainous blocks that form Al-Idrisi Montes, at the summits of Tenzing Montes

52 (Supplementary Fig, 6g), and within the high-altitude bladed terrain.

53

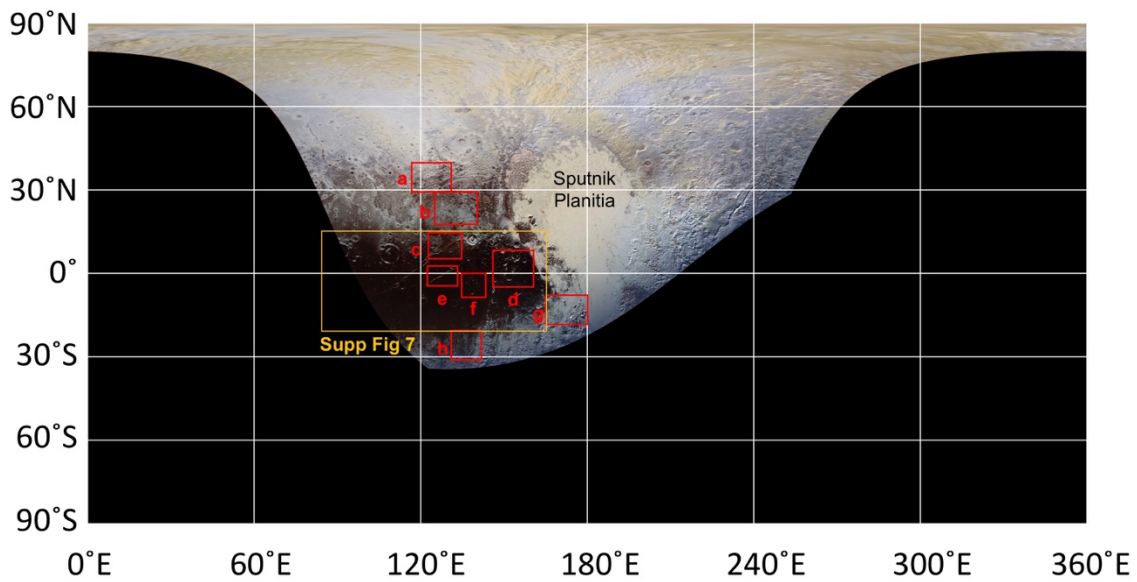

54

55 **Supplementary Fig. 5. Map of Pluto as seen by New Horizons in July 2015 (cylindrical**

56 **projections).** The red boxes labeled a-f indicate areas shown in detail in Supplementary Fig. 6 and

57 discussed in Section SD1. From North to South: **(a)** Venera Terra and Inanna and Dumuzi Fossae,

58 **(b)** Viking Terra, **(c)** Virgil Fossae, north of Cthulhu, **(d)** Brinton and Harrington craters in

59 Cthulhu, **(e)** Beatrice Fossae in Cthulhu, **(f)** Center Cthulhu, **(g)** Tenzing Montes, south of Sputnik

60 Planitia, **(h)** South Cthulhu. The yellow box indicates the large area of Cthulhu shown in

61 Supplementary Fig. 7.

62

63

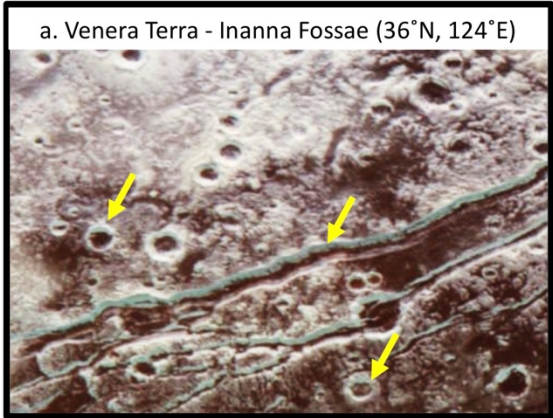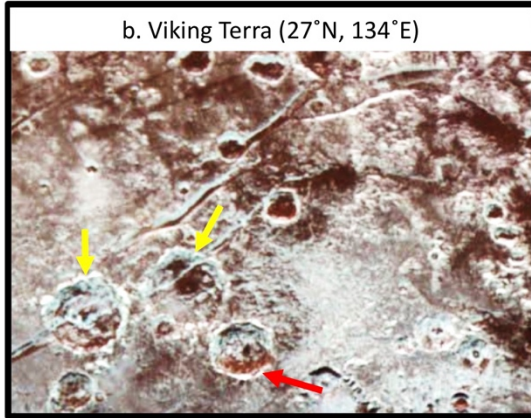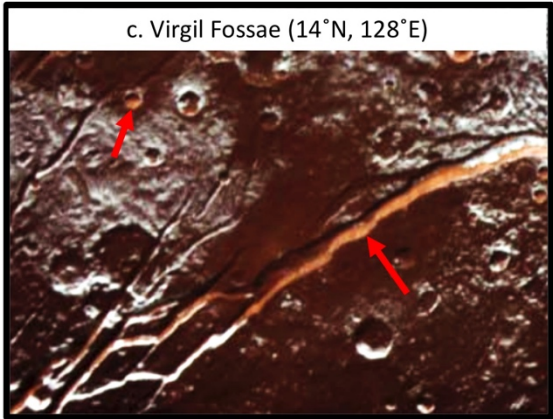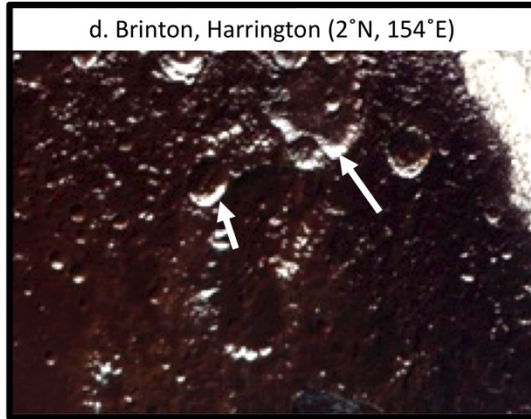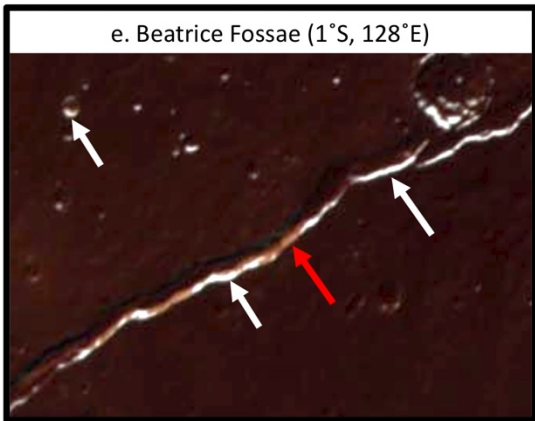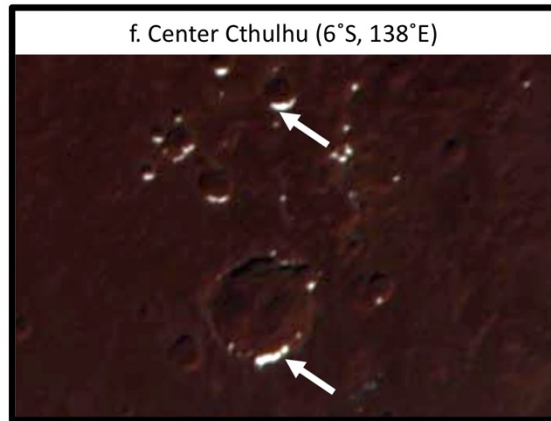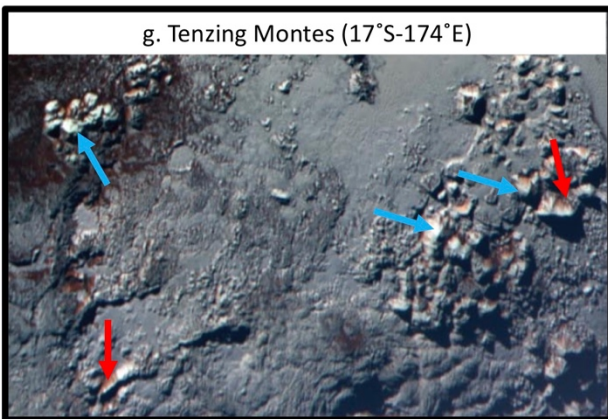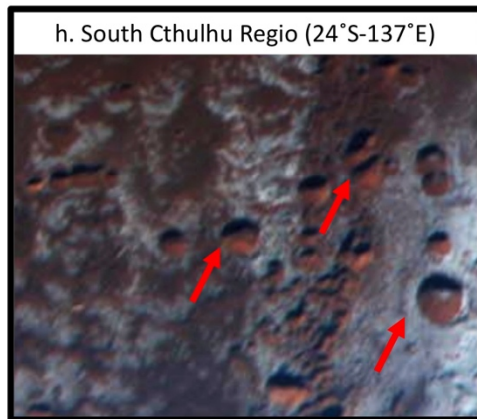

65  
66  
67  
68  
69  
70  
71  
72  
73

**Supplementary Fig. 6. CH<sub>4</sub> frost and reddish materials on mountain summits and**

**slopes.** Cylindrical projections of Pluto's map showing the locations indicated by the red boxes in

Supplementary Fig. 5. Blue arrows show CH<sub>4</sub>-ice capped mountains, white and yellow arrows

show CH<sub>4</sub> ice on north- and south-facing slopes respectively (craters walls and rims, faults) and

red arrows show reddish materials on slopes, that are differentiated from surrounding material of

Cthulhu by appearing brighter and redder.



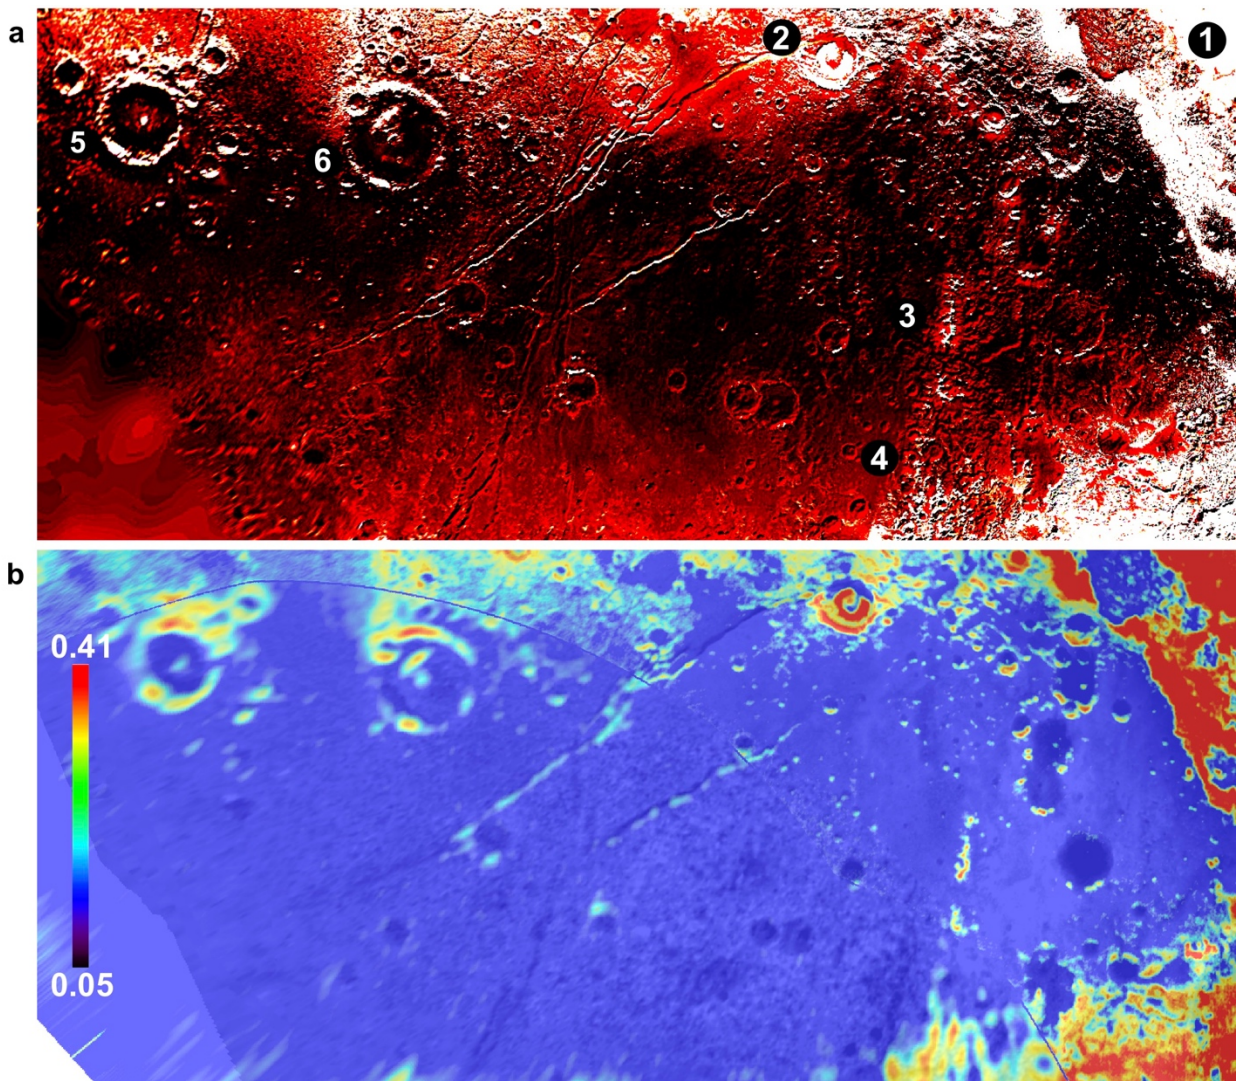

74

75 **Supplementary Fig. 7. CH<sub>4</sub> frost in the region of Cthulhu.** (a) Cthulhu shown in false colours  
 76 (constructed from blue 400-550 nm, red 540-700 nm, and near-IR filter 780-975 nm images from  
 77 the Ralph instrument) with a hard contrast stretch to highlight the different colours within the  
 78 mantling of the materials. The area corresponds to the yellow box in Supplementary Fig. 5. Outside  
 79 Sputnik Planitia (1) and the floor of Elliot crater (2), which are covered by N<sub>2</sub> ice, the areas in  
 80 white highlight the presence of fresh, bright CH<sub>4</sub> ice, on top of Pigafetta (3) and Elcano Montes  
 81 (4), and on the north-facing slopes of many craters in Cthulhu, including the largest craters Oort  
 82 (5) and Edgeworth (6) in the north-western region of Cthulhu. The red colour is seen in the northern

83 and southern regions of Cthulhu, but is reddest on many slopes in the centre of Cthulhu, including  
84 on crater walls and rims, fault scarps, and at the base of the Pigafetta and Elcano mountains. **(b)**  
85 Same region showing the phase index (see definition in “Methods”) of CH<sub>4</sub> ice (from blue to red)  
86 from the analysis of the LEISA data.

87

## 88 **SD2. Investigating the stability of CH<sub>4</sub> frosts on Pluto**

89 In order to explain the CH<sub>4</sub>-frosted peaks on Pluto, it has been suggested that the underlying H<sub>2</sub>O  
90 ice peaks were at some point sufficiently bare to permit deposition of methane such that it could  
91 gain at least a seasonally stable foothold<sup>8</sup>. However, our simulations suggest that CH<sub>4</sub>-rich ice can  
92 deposit onto the dark haze particle blanket in Cthulhu, which despite attaining a higher temperature  
93 relative to a higher albedo surface, can become sufficiently cold at night to allow CH<sub>4</sub> to condense.  
94 Once established, the higher albedo methane deposit would be colder than the dark surroundings,  
95 and so would attract further CH<sub>4</sub> condensation.

96

97 In this paper, we highlight two types of CH<sub>4</sub>-rich ice deposits observed in Cthulhu, which differ  
98 by their mechanism of formation. First, CH<sub>4</sub> ice deposits are observed at high elevation coating  
99 the summit regions of mountain ridges (for instance at the summits of Pigafetta Montes). These  
100 deposits are the main focus of this study, and we attribute their formation to a local atmospheric-  
101 topographic effect leading to an atmosphere enriched in gaseous CH<sub>4</sub> at ~4 km altitude, and thus  
102 to saturation in the near-surface atmospheric layer of the mountain’s summits. Second, CH<sub>4</sub>-rich  
103 ice deposits are observed on crater walls and rims, mostly on north-facing slopes in Cthulhu (20°S-  
104 10°N). This suggests that the formation of these frosts is controlled by seasonal changes in  
105 insolation.

106

107 Supplementary Fig. 8 compares the zonal diurnal mean insolation calculated for a flat surface as  
108 well as for 30° north-facing and south-facing slopes across a Plutonian year and across all latitudes  
109 (an inclination of 30° is typical of Pluto's topography at km-scale<sup>12</sup>). The season in 2015 was  
110 northern spring, which Pluto entered in 1988. In 2015, at all latitudes, the north-facing slopes  
111 received more flux than the south-facing slopes (note that the latitudes below 38°S are in the polar  
112 night). However, we hypothesize that the CH<sub>4</sub> ice deposits observed in 2015 by New Horizons on  
113 the north-facing slopes of the equatorial regions formed during the immediately preceding northern  
114 fall and winter. This period would have commenced in 1840 when the north-facing slopes started  
115 to receive less flux than the south-facing slopes, becoming colder and attracting more CH<sub>4</sub> ice as  
116 a result. During this period, any CH<sub>4</sub> ice deposits on the south-facing slopes must have sublimed  
117 as these slopes received significant insolation (Supplementary Fig. 8d).

118

119 Supplementary Fig. 9 compares the zonal mean flux received by flat and 30° inclined surfaces, on  
120 annual average and on average over the period 1840-2015. On a flat surface, the annual mean flux  
121 received is higher at high latitudes than in the equatorial regions, as a result of Pluto's high  
122 obliquity. For north-facing slopes, the annual mean flux is lower at southern latitudes and at the  
123 equator than it is for northern latitudes, while for south-facing slopes, the flux is lower at northern  
124 latitudes and at the equator than it is for southern latitudes. In the equatorial regions, the slopes  
125 (e.g. crater walls) receive a lower annual mean flux than the flat surface (e.g. crater floor) does.  
126 Since the north- and south-facing walls of equatorial craters receive the same annual mean flux,  
127 the CH<sub>4</sub> frosts observed on north-facing walls in 2015 could be seasonal deposits that have been

128 lingering since the last northern winter, and would presumably disappear over the coming decades  
129 as the northern hemisphere advances into summer.

130

131 For instance, the CH<sub>4</sub> ice deposits on the north-facing walls may have formed during the period  
132 1840-2015. On average over this period, these slopes receive less flux and are colder than the flat  
133 and south-facing slopes (dashed line on Supplementary Fig. 9). The observation of more extended  
134 CH<sub>4</sub>-rich ice deposits on south-facing slopes above 10°N cannot be explained by the differences  
135 in insolation over this period. Instead, they would be better explained by the annual mean flux.

136

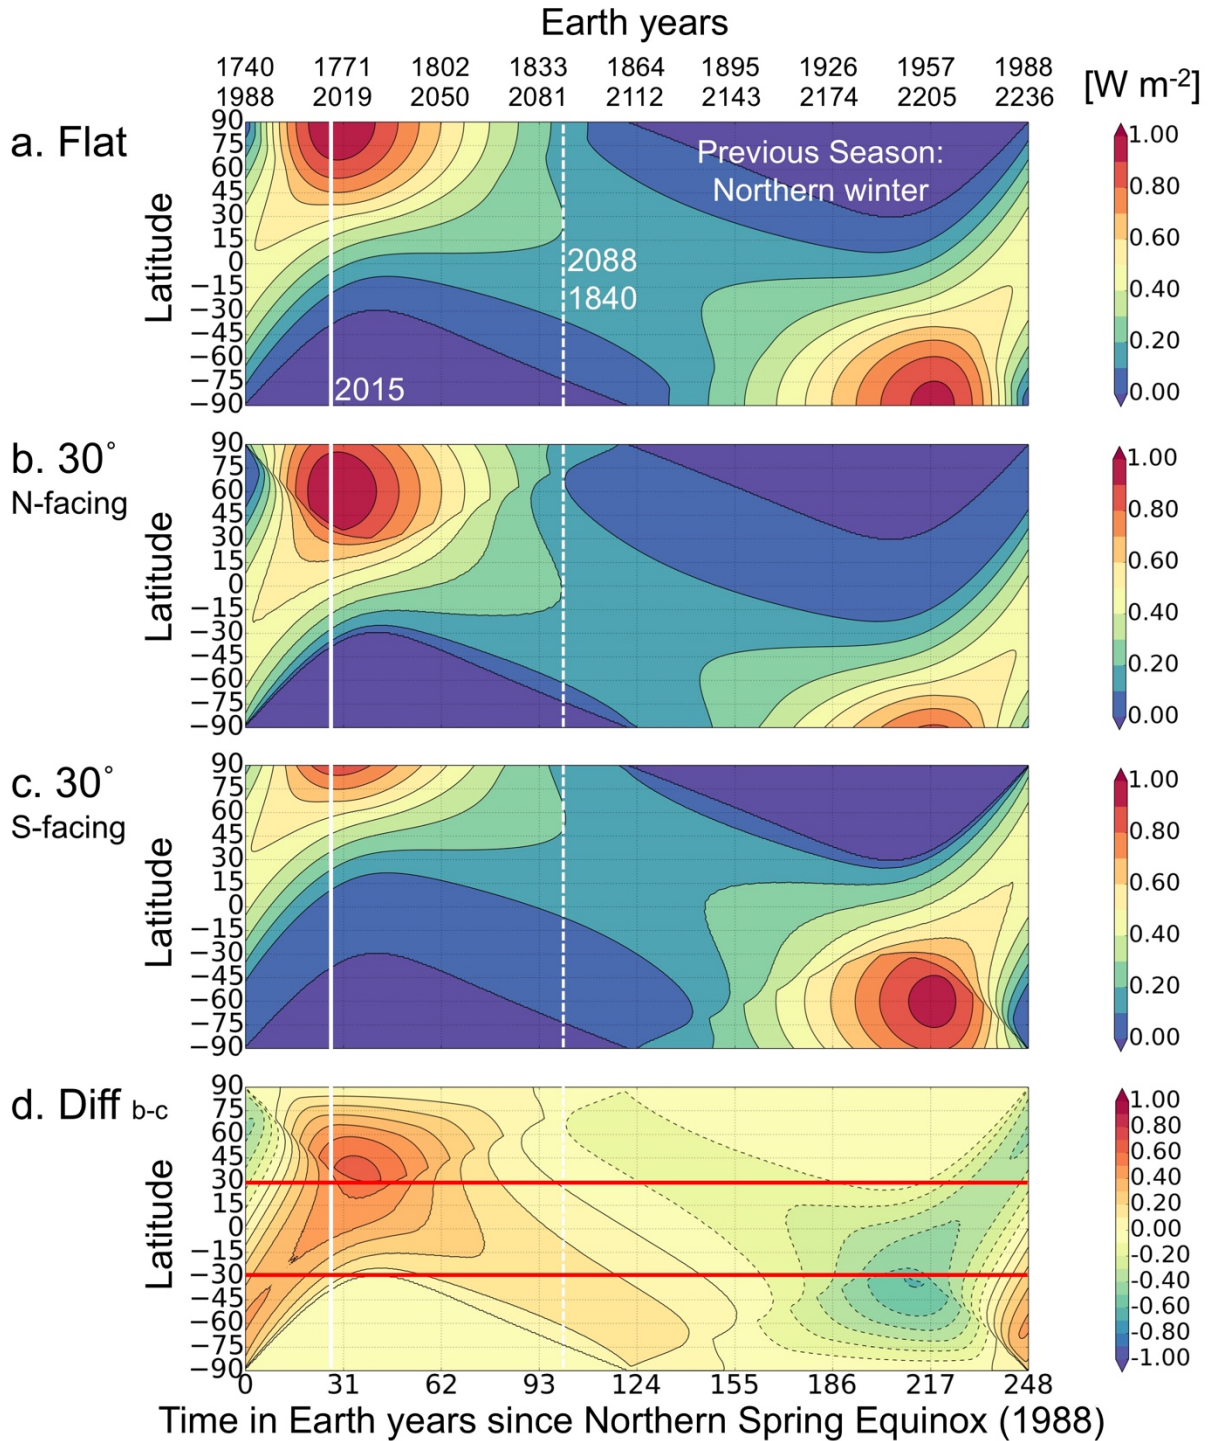

137

138 **Supplementary Fig. 8. Zonal diurnal mean incident insolation on Pluto over one Plutonian**

139 **year. (a)** Received by a flat surface, **(b)** Received by a 30° north-facing surface, **(c)** Received by

140 a 30° south-facing surface. **(d)** Difference between the zonal diurnal mean insolation received by

141 a 30° north-facing and a 30° south-facing surface (**b** minus **c**). The vertical white solid line indicates  
 142 the year of the New Horizons flyby (2015) and the white dashed line indicates the years 1840 and  
 143 2088 (separated by one Plutonian year), which respectively mark the last and the next occasions  
 144 when the north-facing surfaces start to receive less flux than the south-facing surfaces. The  
 145 horizontal red lines on **d** indicate the approximate bounding latitudes of Cthulhu (30°S-30°N).  
 146

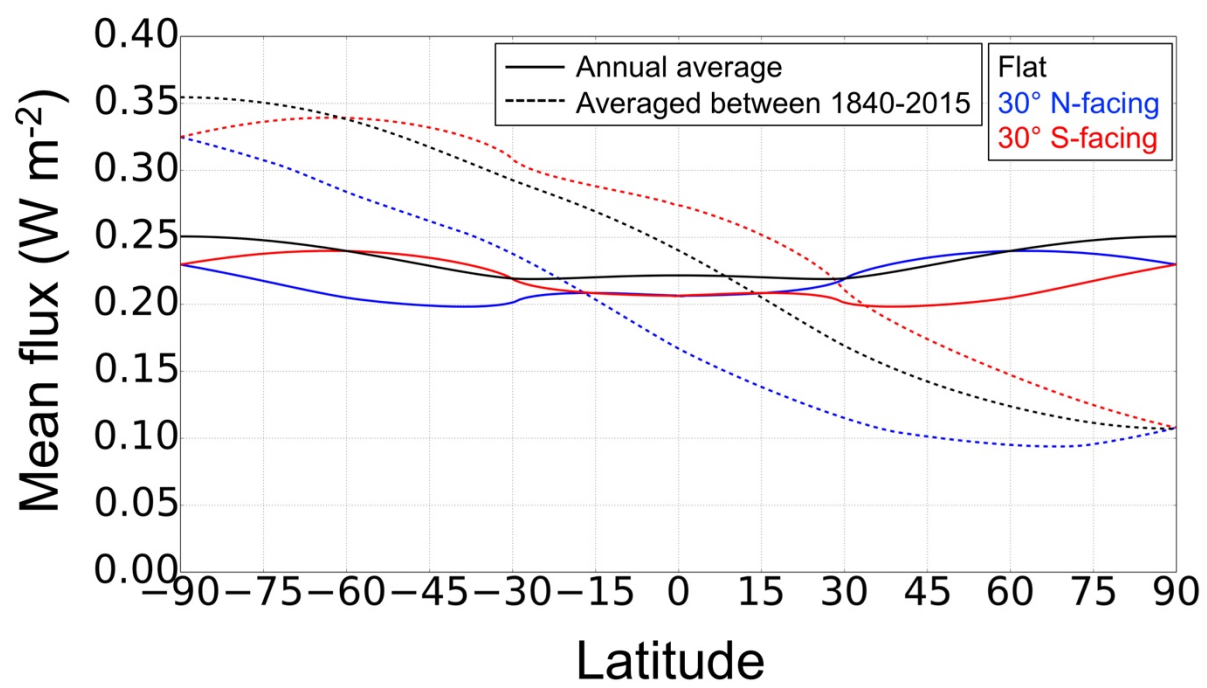

147  
 148 **Supplementary Fig. 9. Mean insolation across Pluto’s surface.** Annual mean insolation (solid  
 149 lines) and insolation averaged over 175 Earth years (1840-2015, dashed lines) that are received by  
 150 a flat surface (black line), a 30° north-facing (blue line) and a 30° south-facing surface (red line).  
 151  
 152  
 153  
 154

155 **The reddish material: evidence for past CH<sub>4</sub> frost coverage?**

156 In the southern regions of Cthulhu, between 20°S and 30°S, there are craters with no CH<sub>4</sub>-rich frost  
157 on their north-facing slopes, but which do show a reddish surface (with a higher albedo than the  
158 darker plains of Cthulhu around them). Similar reddish areas are seen at the bases of north-facing  
159 slopes on mountains in the vicinity of Wright Mons (Supplementary Fig. 6g, while reddish slopes  
160 alternate with brighter, frost-covered slopes on the north-facing scarps of Beatrice and Virgil  
161 Fossae (red arrows on Supplementary Fig. 6). In general, the northern and southern regions of  
162 Cthulhu as well as many crater rims and other peaks within central Cthulhu display brighter and  
163 redder brownish colours than the plains of central Cthulhu, as shown by Supplementary Fig. 7a.

164

165 Whereas the north-facing scarp of a stretch of Virgil Fossa, with a very distinct reddish colour,  
166 may be the signature of cryoclastic deposits<sup>10</sup>, the other reddish areas may be indicative of ancient  
167 deposition of CH<sub>4</sub> frost that recently sublimed. This hypothesis is supported by the fact that the  
168 reddish terrains are observed at similar locations to the CH<sub>4</sub>-rich frosts (on the slopes, and in  
169 particular on the north-facing slopes in Cthulhu) and sometimes are the extension of CH<sub>4</sub>-rich frost  
170 patches. For instance, the north-facing scarp of Beatrice Fossa (Supplementary Fig. 6e) shows an  
171 alternance of bright CH<sub>4</sub>-rich frost and reddish terrain, suggesting that CH<sub>4</sub>-rich frosts were  
172 covering the entire scarp, with the reddish areas being where portions of the frost cover had  
173 recently sublimed. The remaining frost should continue to sublime and disappear, as the incident  
174 insolation on these north-facing walls is increasing with time as the northern hemisphere enters  
175 summer (Supplementary Fig. ED8b). In the case of Pigafetta Montes, their reddish lower slopes  
176 may indicate that the CH<sub>4</sub>-rich frost that currently caps them previously extended farther down  
177 their slopes. In general, a large area of Cthulhu may have been covered by CH<sub>4</sub>-rich frost in a

178 previous season during which the surface temperatures were colder and the concentration of  
179 gaseous CH<sub>4</sub> in the atmosphere allowed deposition at lower elevations.

180

181 The locations where the reddish terrains are observed correspond to locations where the water ice  
182 bedrock has been detected by LEISA (Supplementary Fig. 7b). This suggests that the deposition  
183 and sublimation of CH<sub>4</sub> frost on these slopes have mobilized and depleted dark haze particles on  
184 these slopes, thus revealing more of the water ice bedrock.

185 In this paper, we hypothesize that the CH<sub>4</sub>-rich ice seen on top of Pigafetta Montes is seasonal,  
186 based on the fact that (1) similar frosts are seen on north-facing slopes but not on south-facing  
187 slopes of lower-elevation crater walls/rims and fault scarps in eastern Cthulhu; if the thicknesses  
188 of CH<sub>4</sub> deposits on these slopes are the same as on top of Pigafetta Montes, then the CH<sub>4</sub> frosts  
189 there may also be seasonal, and (2) brighter and redder brownish colours seem to surround  
190 Pigafetta Montes and may be indicative of a more extended CH<sub>4</sub> frost coverage in these regions  
191 during a previous season.

192 However, it remains possible that the CH<sub>4</sub>-rich deposits on top of Pigafetta Montes are much  
193 thicker than the few millimetres produced by our simulations (maybe up to few metres thick). If  
194 so, they could subsist there over multiple Pluto years. A net annual positive mass balance could  
195 occur if the amounts of CH<sub>4</sub> involved during the “condensation season” are large enough to subsist  
196 during the “sublimation season”. Albedo feedbacks could also help build thicker deposits there  
197 beyond a few millimeters.

198

199 Would it be possible for climatic patterns across different timescales to ever allow accumulation  
200 of the methane deposits onto these mountains to such thicknesses that they might be significant in



201 terms of affecting the geology and geomorphology of the landscape on which they're emplaced?  
202 The thin, localized CH<sub>4</sub> deposits in eastern Cthulhu stand in stark contrast to the expansive CH<sub>4</sub>  
203 bladed terrain deposits that form Tartarus Dorsa and cover much of the low-latitudes of the sub-  
204 Charon hemisphere, and which reach thicknesses exceeding a kilometre<sup>8,16</sup>. The gradual eastwards  
205 tapering of the bladed deposits, such that they vanish entirely at 75°E, forms part of the surficial  
206 composition sequence that has been identified within Pluto's equatorial uplands<sup>8</sup>, from dominance  
207 by nitrogen closest to Sputnik Planitia, to increasing dominance of methane ice to the east  
208 culminating in the bladed terrain deposits, to the eventual expiration of large scale deposits of both  
209 nitrogen and methane, leaving the landscape of eastern Cthulhu to be mantled by the haze particle  
210 blanket, and nitrogen and methane deposits to be limited to small-scale occurrences within deep  
211 depressions and mountain peaks/crater rims respectively. This sequence at least partly corresponds  
212 to an altitudinal control on ice stability<sup>8</sup>, certainly within the localized region covering East  
213 Tombaugh Regio and Tartarus Dorsa, but the massive scale of the compositional sequence  
214 (covering >300° of longitude from East Tombaugh Regio to eastern Cthulhu) implies that global-  
215 scale, longitudinal effects are arguably a more important controlling factor. While it remains to be  
216 investigated thoroughly using 3D global climate models, this longitudinal asymmetry has been  
217 interpreted as having dynamical origins<sup>18</sup>, whereby throughout Pluto's history since the formation  
218 of Sputnik Planitia, climatic conditions to the east of Sputnik Planitia have consistently favoured  
219 the deposition of CH<sub>4</sub> ice and other volatiles, whereas conditions to the west of Sputnik Planitia  
220 have not favoured such deposition. Here, the conditions required for deposition are only met at  
221 select localities, including at the summits of high-elevation peaks, or on the pole-facing slopes of  
222 craters, meaning that the deposits are limited to being small-scale and transient, and cannot thicken  
223 or expand laterally to become geologically significant and perennial units in the way the bladed

224 terrain deposits have. While it has been observed that the lower slopes of both Pigafetta and Elcano  
225 Montes appear dissected, with Pigafetta Montes displaying fluted slopes and Elcano Montes  
226 exhibiting dendritic, deeply incised valleys, this morphology has been attributed to glacial erosion  
227 by flowing N<sub>2</sub> ice<sup>1</sup>, which displays low viscosity at Pluto conditions<sup>2</sup>. CH<sub>4</sub> ice, by contrast, is  
228 sufficiently rigid to preclude it from flowing at such conditions<sup>2,3</sup>, so the dissected morphology  
229 cannot therefore be interpreted as evidence for past, expanded CH<sub>4</sub> ice coverage.

230

231 [1] Howard, A. D., and 13 colleagues (2017). Present and past glaciation on Pluto. *Icarus* 287,  
232 287-300, doi:10.1016/j.icarus.2016.07.006

233 [2] Eluszkiewicz, J. and Stevenson, D. J. (1990). Rheology of solid methane and nitrogen:  
234 applications to Triton. *Geophysical Research Letters* 17, 1753.

235 [3] Moore, J. M., and 16 colleagues (2017). Sublimation as a landform-shaping process on Pluto.  
236 *Icarus* 287, 320.

237

238

239

240

241

242

243

244

245
